# Supplementary material
Source: Research Square preprint supplement (doi:10.21203/rs.3.rs-8917450/v1)

Appendix 1.
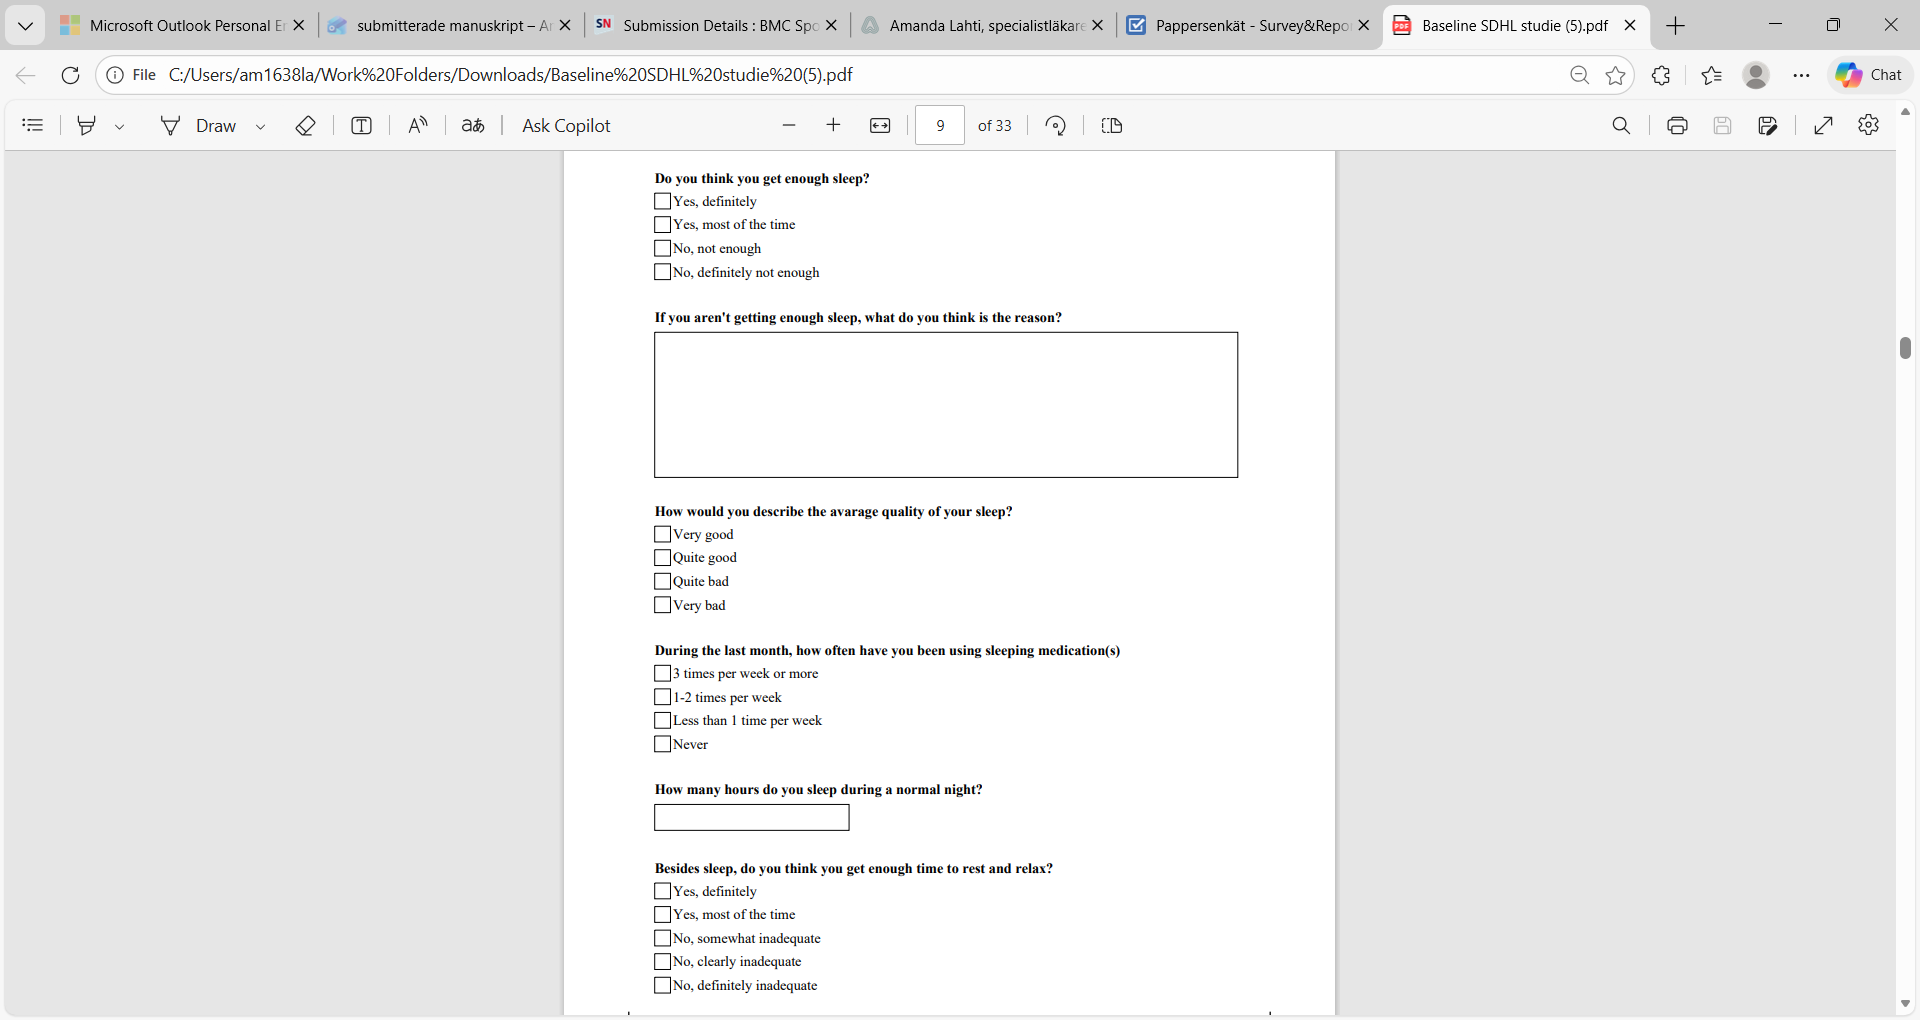


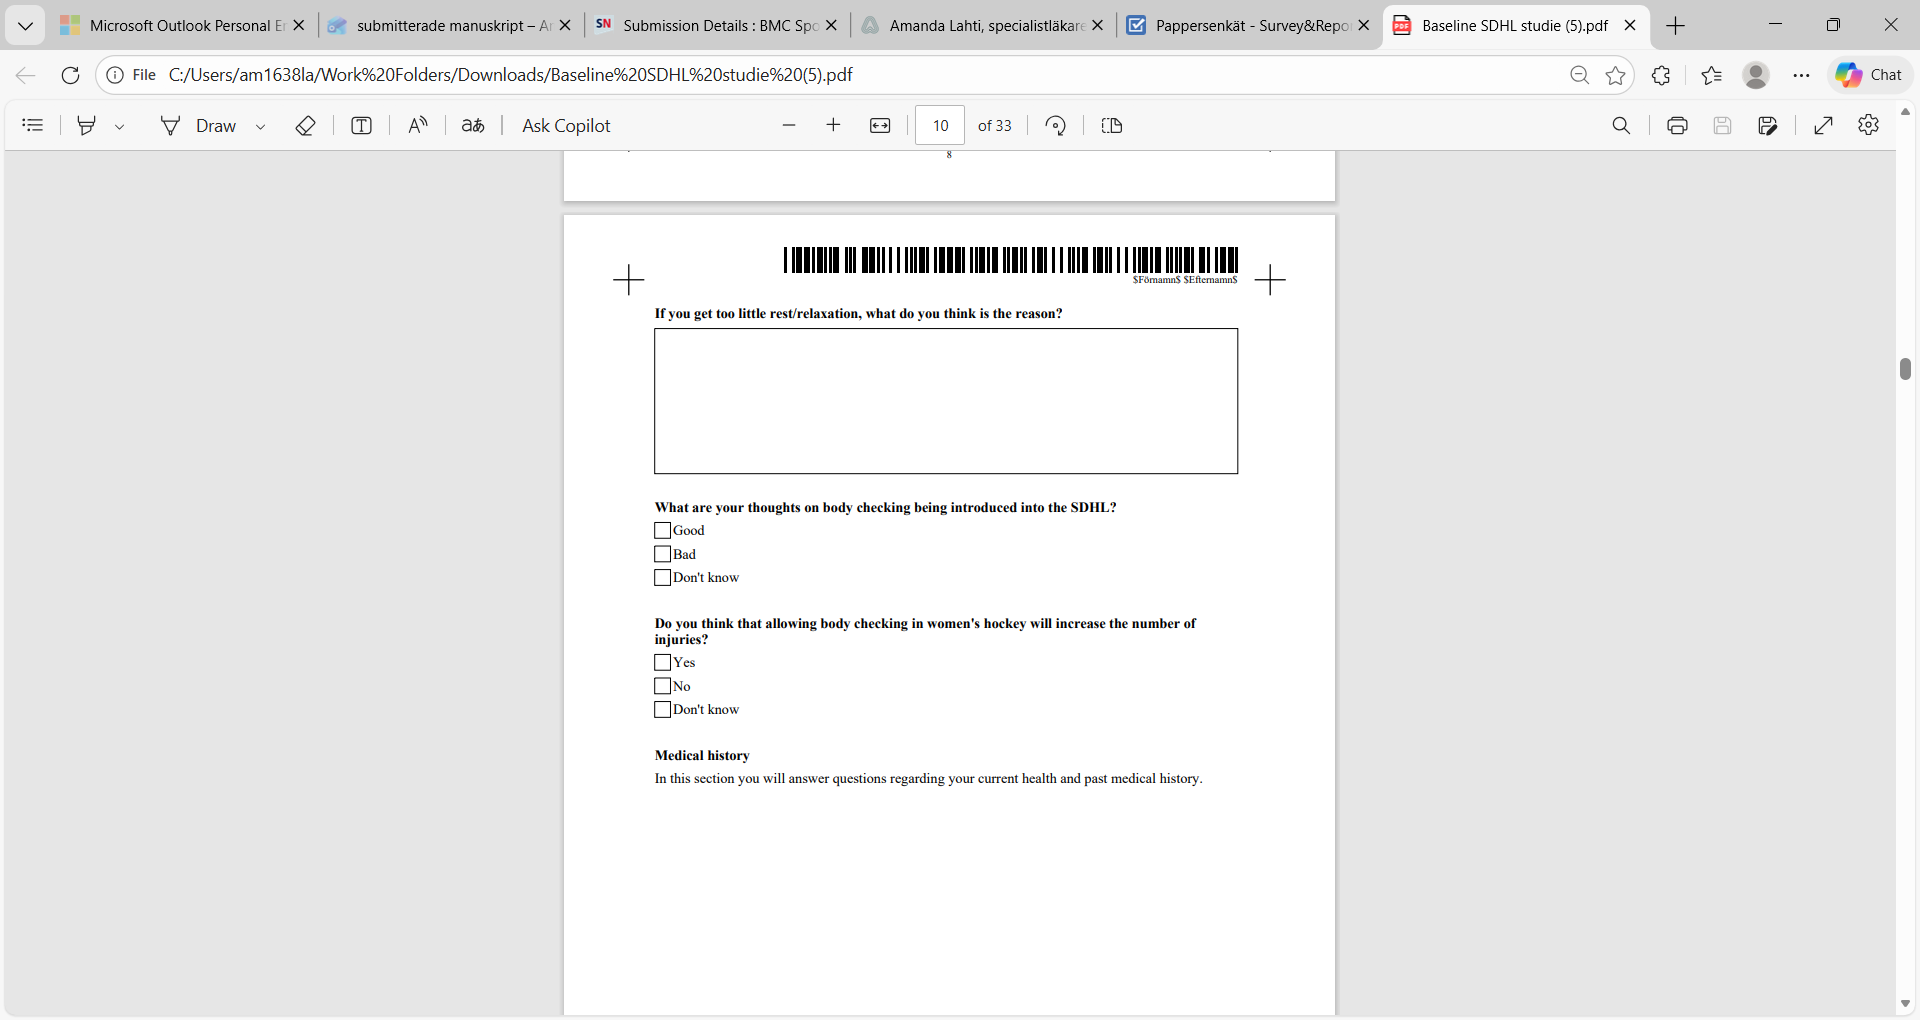

Supplement: Supplementary file 1 [file f6a63c5c8a392f3c1436c626.docx]
